# Supplementary material for: Flanker Task-Elicited Event-Related Potential Sources Reflect Human Recombinant Erythropoietin Differential Effects on Parkinson's Patients
Source: Parkinsons Dis. 2020 May 22;2020:8625794. doi: 10.1155/2020/8625794 (PMC7261337; doi:10.1155/2020/8625794)
Supplement: Supplementary Materials — The number 1 in the initial submission contained the tables with the raw behavioural performance of the participants in the flanker task: reaction time, errors, and hits. The second supplementary material we uploaded contained the raw behavioural performance of the participants in the flanker task: reaction time, errors, and hits. And we added the final tables of the output of the statistical analysis and the amplitude of the N2 component. [file 8625794.f1.xlsx]

## Sheet: Answers 
	CONGRUENT			INCONGRUENT			total	% non answers		Amplitud N2
Healthy controls	hits	errors	Non answer	hits	errors	non answers
1	154	1	5	306	3	11	480	16		-2.2
2	133	5	22	288	8	24	480	46		-3.56
3	140	1	19	280	10	30	480	49		-3.2
4	147	5	8	291	13	16	480	24		2.34
5	142	4	14	294	9	17	480	31		-2.24
6	146	1	13	300	3	17	480	30		-2.72
7	143	8	9	298	12	10	480	19		-2.8
8	154	3	3	301	13	6	480	9		1.92
9	157	2	1	309	10	1	480	2		-4.2		0.48054
					9				mean	-1.85111
PD Control
1	139	2	19	301	11	8	480	27		-2.3
2	144	5	11	294	20	6	480	17		-2.98
3	114	4	42	221	43	56	480	98		1.4
4	126	14	20	265	28	27	480	47		-2.3
5	112	9	39	254	19	47	480	86		-3.5
6	61	24	75	100	50	170	480	245		-0.51
7	144	4	12	286	25	9	480	21		-3
8	151	9	0	253	59	8	480	8		-0.34
9	152	8	0	285	33	2	480	2		-0.94		0.767808
					32				mean	-1.60778
PD rHUEPO
1	123	27	10	242	62	16	480	26		0.23
2	143	6	11	281	16	23	480	34		1.2
3	146	5	9	275	36	9	480	18		-2.3
4	111	16	33	189	72	59	480	92		2.3
5	133	16	11	229	71	20	480	31		0.92
6	134	13	13	265	37	18	480	31		2
7	128	16	16	251	40	29	480	45		1.13
8	130	18	12	245	41	34	480	46		2.1
9	152	2	6	289	14	17	480	23		0.6		0.175147
					43.2222				mean	0.908889

## Sheet: Reaction Time
		REACTION TIME HITS mean/SD				REACTION TIME ERRORS mean SD
		congruent	SD	incongruent	SD	congruent	SD	incongruent	SD
HEALTHY CONTROLS	1	356	12	382	19	301	32	390	11
	2	513	27	482	26	490	39	482	13
	3	420	23	394	29	338	59	401	16
	4	349	12	445	38	517	48	515	17
	5	442	34	456	37	430	63	436	16
	6	426	21	398	28	211	43	289	13
	7	414	39	376	43	488	47	478	9
	8	424	12	471	21	302	29	321	8
	9	357	19	478	27	449	32	442	10
PD-CONTROLS	1	352	23	529	11	523	66	430	13
	2	449	13	494	10	340	65	410	24
	3	373	14	491	12	420	57	501	22
	4	528	45	496	32	503	69	390	13
	5	429	24	354	18	520	62	411	31
	6	468	17	529	12	316	67	312	21
	7	468	36	439	31	439	79	406	23
	8	585	54	481	40	508	75	445	11
	9	490	15	581	15	415	67	409	17
PD-rHUEPO	1	352	27	522	36	537	76	402	12
	2	449	28	482	42	466	76	346	34
	3	372	43	474	58	552	88	506	42
	4	527	65	487	48	451	69	472	63
	5	429	56	419	45	517	70	531	51
	6	462	66	462	43	416	79	427	60
	7	468	29	448	52	526	67	490	31
	8	583	16	440	35	438	79	501	17
	9	492	25	585	29	546	64	390	12

## Sheet: Statistical analysis
Reaction Time	SS	df	MS	F	Prob	Errors Flanker	SS	df	MS	F	Prob
Condition	2301.9	1	4201.9	3.22	0.06	Condition	5201.9	1	5201.9	37.5	0.0014
Group	1800.5	2	3210.2	7.47	0.003	Group	4500.5	2	2250.2	16.2	0
Interaction	1119.4	2	503.69	1.12	0.08	Interaction	1419.4	2	709.69	5.12	0.01
Error	8956.7	48	514.81			Error	6656.7	48	138.68
Anova2 for errors trials
Source	SS	df	MS	F	Prob>F
-----------------------------------------------------
Condition	5201.9	1	5201.85	37.51	0
Group	4500.5	2	2250.24	16.23	0
Interaction	1419.4	2	709.69	5.12	0.0079
Error	6656.7	48	138.68
Total	17778.4	53
Anova2 for hits correct trials
Source	SS	df	MS	F	Prob>F
-----------------------------------------------------
Condition	231150	1	231150	234.77	0
Groups	11276.8	2	5638.4	5.73	0.0059
Interaction	2573.1	2	1286.6	1.31	0.2802
Error	47259.1	48	984.6
Total	292259	53
lme =
Linear mixed-effects model fit by ML
Model information:
Number of observations 27
Fixed effects coefficients 4
Random effects coefficients 0
Covariance parameters 1
Formula:
log(errors) ~ 1 + group*amplitudeN2
Model fit statistics:
AIC BIC LogLikelihood Deviance
230.43 236.91 -110.22 220.43
Fixed effects coefficients (95% CIs):
Name Estimate SE tStat DF pValue Lower Upper
{'(Intercept)' } 1.7224 9.3493 0.18422 23 0.85545 -17.618 21.063
{'group' } 14.102 3.9967 3.5284 23 0.0017991 5.8341 22.37
{'amplitudeN2' } 2.1771 3.4832 0.62502 23 0.53811 -5.0285 9.3826
{'group:amplitudeN2'} 0.0021129 1.7546 0.0012042 23 0.99905 -3.6275 3.6318
Random effects covariance parameters (95% CIs):
Group: Error
Name Estimate Lower Upper
{'Res Std'} 14.342 10.984 18.726
